# Supplementary figures and images for: Role of Agrin in tissue repair and regeneration: From mechanisms to therapeutic opportunities (Review)
Source: PubMed Central journal article supplement — Int J Mol Med. 2024 Sep 11;54(5):98. doi: 10.3892/ijmm.2024.5422 (PMC11410309; doi:10.3892/ijmm.2024.5422), 2024-09-11

Figure S1. PRISMA flowchart for the literature search performed.

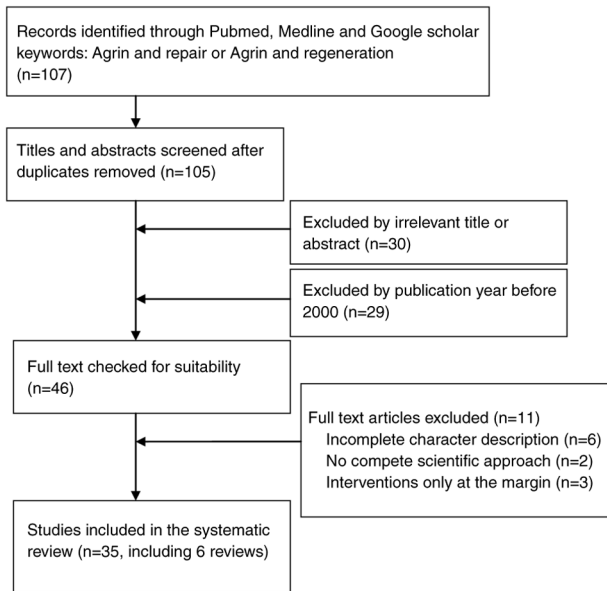

Supplement: Supplementary_Data.pdf [file Supplementary_Data.pdf]
